# Supplementary material
Source: PubMed Central journal article supplement (PMC10586871)
Supplement: DHM-53-85-SD1.pdf [file DHM-53-85-SD1.pdf]

## Glossary

| Abbreviation or term     | Meaning                                                                         |
|--------------------------|---------------------------------------------------------------------------------|
| ACFM                     | actual cubic feet per minute; flow measure unit at ambient conditions           |
| ALPM                     | actual litres per minute; flow measure unit at ambient conditions               |
| BIBS                     | built-in breathing system                                                       |
| CFM                      | (standard) cubic feet per minute                                                |
| $\hat{\epsilon}$         | ventilation effectiveness                                                       |
| G                        | net contaminant volume gain                                                     |
| HBOT                     | hyperbaric oxygen therapy                                                       |
| HCV                      | hyperbaric chamber ventilation                                                  |
| LEV                      | local exhaust ventilation                                                       |
| $\dot{n}_c$              | the rate at which contaminant moles are accumulating in the chamber             |
| $\dot{n}_{c,cons}$       | the rate at which the contaminant moles are consumed in the chamber             |
| $\dot{n}_{c,gen}$        | the rate at which contaminant moles are generated in the chamber                |
| $\dot{n}_{c,in}$         | the rate at which contaminant moles are entering the chamber via HCV            |
| $\dot{n}_{c,out}$        | the rate at which contaminant moles are exiting the chamber via HCV             |
| $P_c$                    | contaminant partial pressure in the chamber atmosphere                          |
| $P_{ch}$                 | chamber pressure (absolute)                                                     |
| $P_{c,in}$               | contaminant partial pressure in the ventilation gas                             |
| $P_{c,max}$              | contaminant partial pressure threshold limit value in the chamber atmosphere    |
| $P_s$                    | standard pressure; 100 kPa (1 bar)                                              |
| R                        | chamber pressurisation rate                                                     |
| SEV                      | surface equivalent value                                                        |
| STP                      | standard temperature and pressure; 273.15 K (0°C), 100 kPa (1 bar)              |
| $T_{ch}$                 | chamber temperature (absolute)                                                  |
| $T_s$                    | standard temperature; 273.15 K (0°C)                                            |
| $V_{ch}$                 | floodable chamber volume                                                        |
| $V_{T,STP}$              | total gas volume in the chamber                                                 |
| $\dot{V}_{vent,in,STP}$  | ventilation inflow                                                              |
| $\dot{V}_{vent,out,STP}$ | ventilation outflow                                                             |
| z                        | contaminant volume concentration                                                |
| $z_{in}$                 | contaminant volume concentration in the incoming ventilation gas in the chamber |
| $z_{out}$                | contaminant volume concentration in the exhausted gas                           |
| $z_{ss}$                 | contaminant volume concentration at the steady state                            |
